# Supplementary material
Source: Springer Nature journal article supplement (https://www.springermedizin.de/resource/supplementary/12958_2008_470_MOESM4_ESM.pdf/9567978)

mRNA (fold change)

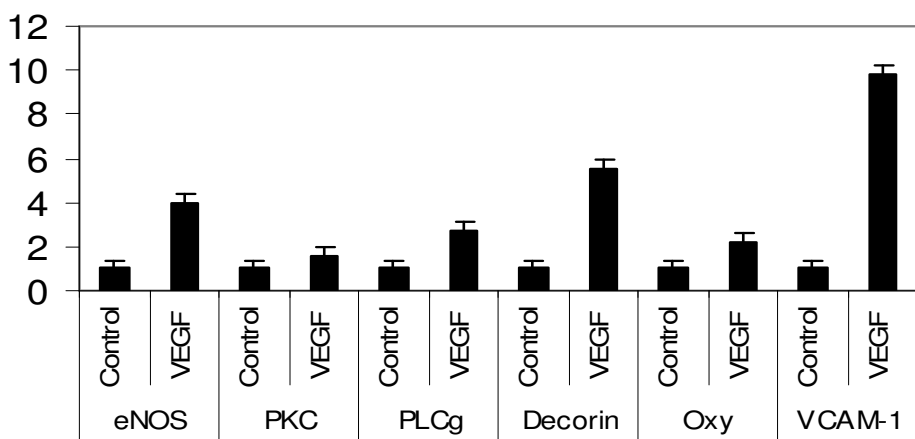

**Cervix of non-pregnant mice**

Supplement: MOESM4 [file 9567978]
